# Supplementary material for: A probe-mediated fluorescent biosensor for MC-LR detection using exonuclease III as a signal amplifier
Source: Royal Society of Chemistry journal article supplement (doi:10.1039/d4ay02027h), 2025-01-01
Supplement: d4ay02027h4.pdf [file d4ay02027h4.pdf]

## Supplementary Material

### **Probe-mediated fluorescent biosensor for MC-LR detection using exonuclease III as a signal amplifier**

Yuyan Wang<sup>a</sup>, Ying Zeng<sup>a</sup>, Xiaoya Ren<sup>a</sup>, Jun Qiu<sup>b</sup>, Jiafeng Pan<sup>a\*</sup>, Fei Yang<sup>a,\*</sup>

<sup>a</sup> Hunan Province Key Laboratory of Typical Environmental Pollution and Health Hazards, School of Public Health, Hengyang Medical School, University of South China, Hengyang 421001, China.

<sup>b</sup> Hunan Children's Hospital, Hunan 410000, China.

\*Corresponding author.

E-mail addresses: [jiafengpan0928@163.com](mailto:jiafengpan0928@163.com) (J. Pan), [yangfeilong@126.com](mailto:yangfeilong@126.com) (F. Yang).

**Table S1** Sequences of Oligonucleotides Used in the Experiments.

| Name             | Sequence (from 5' to 3')                                                                                                                                              |
|------------------|-----------------------------------------------------------------------------------------------------------------------------------------------------------------------|
| Aptamer          | GGC GCC AAA CAG GAC CAC CAT GAC AAT TAC CCA TAC<br>CAC CTC ATT ATG CCC CAT CTC CGC TTT TTT                                                                            |
| Blocker          | GCG GAG ATG GGG CAT TTT TTT (21nt)<br>GCG GAG ATG GGG CAT AAT TTT TT (23nt)<br>GCG GAG ATG GGG CAT AAT GTT TTT T (25nt)<br>GCG GAG ATG GGG CAT AAT GAG TTT TTT (27nt) |
| Hairpin<br>probe | FAM-AGA CTA GAC CGG AAC GAC GGT CTA GTC I(BHQ1)-ATG<br>CCC CAT CTC CGC                                                                                                |

## **PAGE procedure**

Natural polyacrylamide gel electrophoresis was performed by electrophoresis (15% PAGE). 3.8 mL of ultrapure water, 5 mL of 30% Acr-bis (29:1), 1 mL of 10 × TBE buffer, 100 μL of APS (10%), and 4 μL of TEMED were mixed and polymerized at 37 °C for 1 h. In addition, the loading sample was prepared by mixing 10 μL the resulting solution, 2 μL 100 × SYBR Green solution, and 2 μL 6 × loading buffer. Then, the electrophoresis experiment was carried out at 45 V for 30 min and turned to 90 V for 90 min in 1× TBE buffer (pH=8.0). Finally, the PAGE gel was scanned by the gel image analysis system (Bio-Rad, USA).

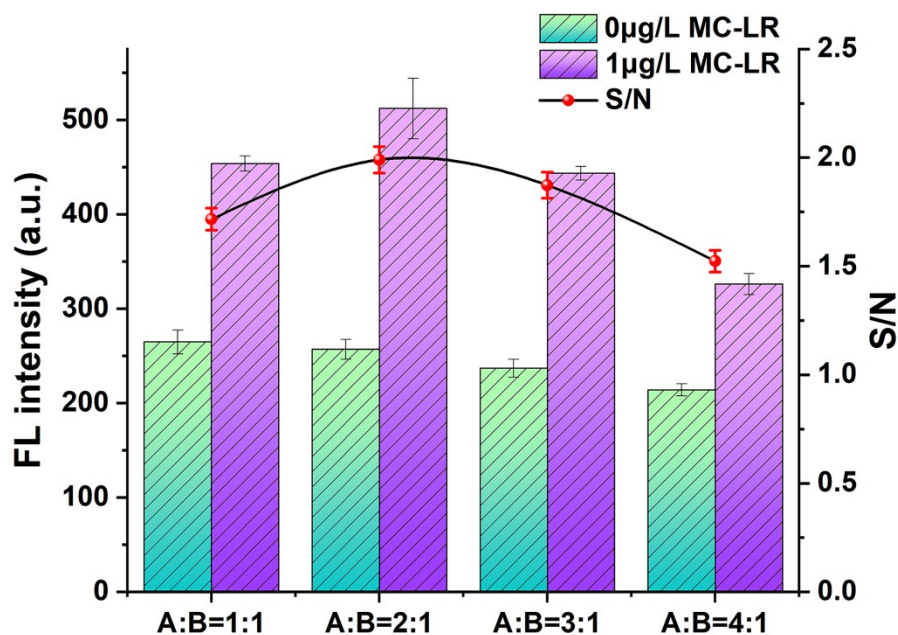

**Fig. S1** Effect of A: B ratio on fluorescence of sensor. Fix the concentration of B at 100 nM. Error bars =  $\pm$  SD, n = 3.

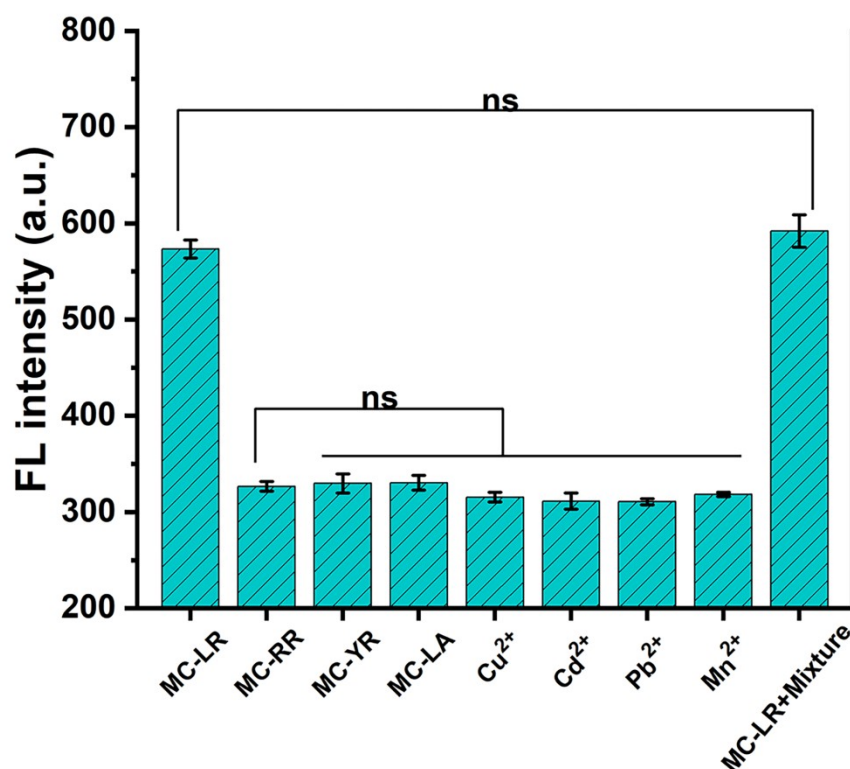

**Fig. S2** Fluorescence methods. The mixture was composed of MC-LR, MC-RR, MC-YR, MC-LA, Cu<sup>2+</sup>, Cd<sup>2+</sup>, Pb<sup>2+</sup>, and Mn<sup>2+</sup>. Ns: no significance. Error bars =  $\pm$  SD, n = 3.

**Table S2** Comparison of detection sensitivity between our MC-LR detection aptasensor and some previously reported methods.

| Method                                                                                   | Dynamic range<br>( $\mu\text{g/L}$ ) | LOD (ng/L) | Reference |
|------------------------------------------------------------------------------------------|--------------------------------------|------------|-----------|
| Surface-enhanced Raman spectroscopy (SERS) -based sensor                                 | 1.56 - 50                            | 290        | 1         |
| Electrochemical aptamer-based sensor                                                     | $3 \times 10^{-2}$ - 1               | 9.2        | 2         |
| Copper nanoclusters-based fluorescent probes                                             | $1 \times 10^{-2}$ - $1 \times 10^3$ | 4.8        | 3         |
| A silane carbon dots based fluorescent enzyme-linked immunoassay                         | $1 \times 10^{-3}$ - 3.20            | 0.6        | 4         |
| Dual-modal split-type immunosensor                                                       | $5 \times 10^{-5}$ - 5               | 0.03       | 5         |
| SERS-based aptasensor                                                                    | $1 \times 10^{-2}$ - $2 \times 10^2$ | 2          | 6         |
| Signal-off ECL sensing model                                                             | $1 \times 10^{-3}$ - $2 \times 10^2$ | 0.2        | 7         |
| Au/CeO <sub>2</sub> /g-C <sub>3</sub> N <sub>4</sub> -based photoelectrochemical sensors | $5 \times 10^{-5}$ - $1 \times 10^2$ | 0.01       | 8         |
| Raman spectroscopic dual-modal aptasensor                                                | 0.1 - 50                             | 0.5        | 9         |
| Exonuclease III-assisted amplification fluorescent aptasensor                            | $1 \times 10^{-3}$ - 10              | 0.37       | This work |

## References

- 1 B. Huo, L. Xia, Z. Gao, G. Li, Y. Hu, *Anal. Chem*, 2022, **94**, 11889-11897.
- 2 V. Vogiazzi, A. A. de la Cruz, E. A. Varughese, W. R. Heineman, R. J. White, D. D. Dionysiou, *ACS EST Engg*, 2021, **1**, 1597-1605.
- 3 Y. Zhang, Y. Lai, X. Teng, S. Pu, Z. Yang, P. Pang, H. Wang, C. Yang, W. Yang, C. J. Barrow, *Anal. Methods*, 2020, **12**, 1752-1758.
- 4 Z. L. Xu, S. L. Ye, L. Luo, X. Hua, J. X. Lai, X. P. Cai, Q. W. Liang, H. T. Lei, Y. M. Sun, Y. Chen, X. Shen, *Sci. Total Environ*, 2020, **708**, 134614.
- 5 J. Wei, W. Chang, A. Qileng, W. Liu, Y. Zhang, S. Rong, H. Lei, Y. Liu, *Anal. Chem*, 2018, **90**, 9606-9613.
- 6 D. He, Z. Wu, B. Cui, Z. Jin, *Food Chem*, 2019, **278**, 197-202.
- 7 M. Li, H. Lin, S. K. Paidi, N. Mesyngier, S. Preheim, I. Barman, *ACS sens*, 2020, **5**, 1419-1426.
- 8 X. Ouyang, L. Tang, C. Feng, B. Peng, Y. Liu, X. Ren, X. Zhu, J. Tan, X. Hu, *Biosens. Bioelectron*, 2020, **164**, 112328.
- 9 G. Zhao, Y. Du, N. Zhang, Y. Li, G. Bai, H. Ma, D. Wu, W. Cao, Q. Wei, *Anal. Chem*, 2023, **95**, 8487-8495.
