# Supplementary figures and images for: A probe-mediated fluorescent biosensor for MC-LR detection using exonuclease III as a signal amplifier
Source: Royal Society of Chemistry journal article supplement (doi:10.1039/d4ay02027h), 2025-01-01

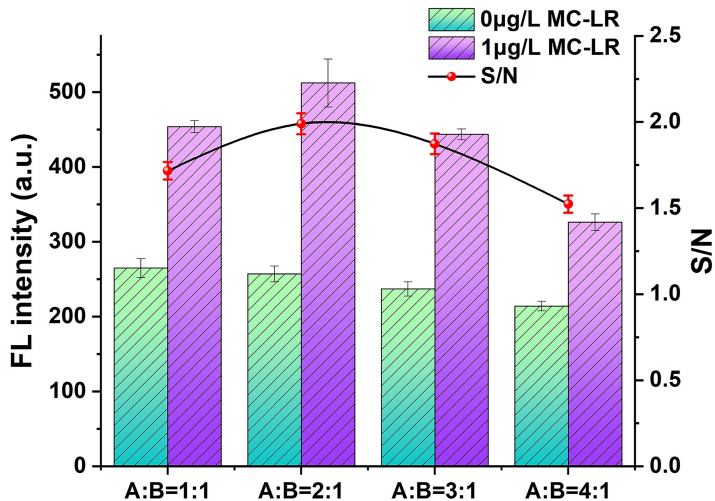

Supplement: d4ay02027h2.pdf [file d4ay02027h2.pdf]

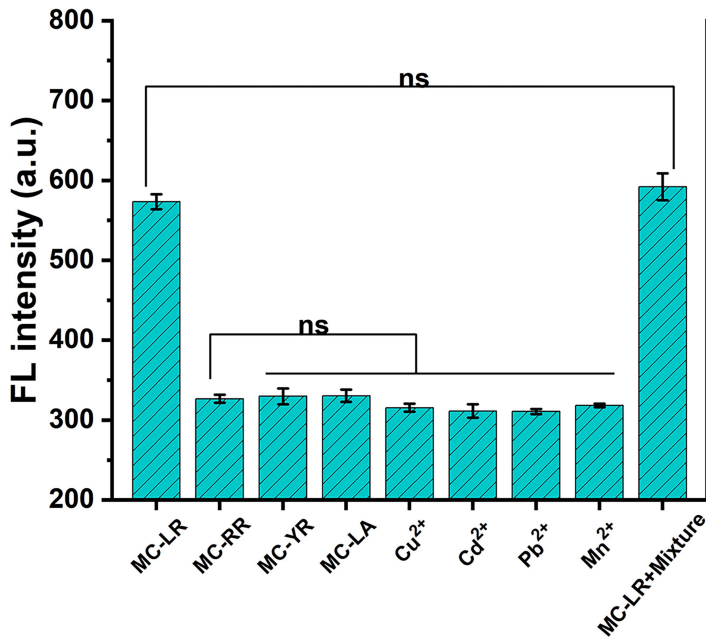

Supplement: d4ay02027h3.pdf [file d4ay02027h3.pdf]
